# Supplementary material for: The High Content of Quercetin and Catechin in Airen Grape Juice Supports Its Application in Functional Food Production
Source: MDPI journal article supplement (doi:10.3390/foods10071532), 2021-07-02
Supplement: s1 [file s1]

## Supplementary Material

**Table S1.** Parameters to analyze the 23 selected polyphenols by mass spectrometry (10 volts were applied in all samples). Q1, m/z of the polyphenol to be analyzed. Q3, indicates the majority and stable fragment. CE (collision energy), DP (declustering potential), CXP (collision cell exit potential) and EP (entrance potential).

| Negative Ionization mode |                       |         |         |             |        |        |         |
|--------------------------|-----------------------|---------|---------|-------------|--------|--------|---------|
| Nº                       | Compound name         | Q1 (Da) | Q3 (Da) | Time (msec) | DP (V) | CE (V) | CXP (V) |
| 1                        | Caffeic acid          | 178.9   | 135     | 5           | -50    | -22    | -9      |
| 2                        | Cumaric acid          | 162.9   | 93      | 5           | -30    | -30    | -5      |
| 3                        | Dihydroxybenzoic acid | 152.9   | 109     | 5           | -75    | -20    | -7      |
| 4                        | Gallic acid           | 168.9   | 124.9   | 5           | -110   | -20    | -7      |
| 5                        | Protocatechuic acid   | 152.9   | 90,9    | 50          | -75    | -32    | -13     |
| 6                        | Salicylic acid        | 136.9   | 93,1    | 50          | -15    | -22    | -5      |
| 7                        | Vanillic acid         | 167.1   | 152     | 50          | -50    | -20    | -10     |
| 8                        | Esculetin             | 175.9   | 133     | 50          | -65,5  | -29    | 12      |
| 9                        | Isorhamnetin          | 315     | 300     | 50          | -225   | -28    | -15     |
| 10                       | Polidatin             | 389.03  | 227.01  | 50          | -110   | -18    | -9      |
| 11                       | Quercetin             | 301.1   | 178.9   | 50          | -50    | -21,15 | -10     |
| 12                       | Resveratrol           | 226.98  | 142.89  | 50          | -95    | -30    | -9      |
| 13                       | Rutin                 | 609     | 299.9   | 50          | -230   | -70    | -9      |
| 14                       | Viniferin             | 453     | 410.9   | 50          | -45    | -36,5  | -9      |
| Positive Ionization mode |                       |         |         |             |        |        |         |
| Nº                       | Compound name         | Q1 (Da) | Q3 (Da) | Time (msec) | DP (V) | CE (V) | CXP (V) |
| 15                       | Chlorogenic acid      | 355.1   | 163     | 50          | 46     | 21     | 10      |
| 16                       | Elagic acid           | 303.2   | 285.2   | 50          | 100    | 27     | 5       |
| 17                       | Ferulic acid          | 195     | 167     | 50          | 50     | 11.13  | 10      |
| 18                       | Apigenin              | 271     | 253.1   | 50          | 100    | 14     | 10      |
| 19                       | Catechin              | 291     | 139     | 50          | 16     | 21     | 10      |
| 20                       | Epicatechin           | 291     | 138.9   | 50          | 36     | 21     | 8       |
| 21                       | Kaempferol            | 285     | 153     | 50          | 111    | 43     | 10      |
| 22                       | Luteolin              | 285     | 153     | 50          | 100    | 89     | 10      |
| 23                       | Siringaldehyde        | 183     | 123.1   | 50          | 41     | 17     | 8       |

**Table S2.** Calibration data of the polyphenols selected for their quantification and family to which they belong. The correlation coefficient ( $r^2$ ), the limit of detection (LOD) and the limit of quantification (LOQ) are included for each of the polyphenols.

| Family                | Polyphenol            | Ionization mode | Retention time (min) | Calibration curve      | LOD (mg/L) | LOQ (mg/L) | $r^2$ |
|-----------------------|-----------------------|-----------------|----------------------|------------------------|------------|------------|-------|
| Hydroxycinnamic acids | Caffeic acid          | -               | 19.26                | $y = 244.62x - 604.68$ | 0.228      | 0.759      | 0.994 |
|                       | Chlorogenic acid      | +               | 16.76                | $y = 334.98x - 917.07$ | 0.022      | 0.075      | 0.996 |
|                       | Cumaric acid          | -               | 21.83                | $y = 5.1843x - 14.455$ | 0.736      | 2.452      | 0.995 |
| Hydroxycumarins       | Esculetin             | -               | 19.83                | $y = 17.313x - 37.133$ | 0.288      | 0.961      | 0.999 |
| Hydroxybenzoic acids  | Protocatechuic acid   | -               | 16.77                | $y = 1.332x - 4.3793$  | 0.360      | 1.201      | 0.997 |
|                       | Salicylic acid        | -               | 28.33                | $y = 353.7x - 895.34$  | 0.053      | 0.175      | 0.992 |
|                       | Dihydroxybenzoic acid | -               | 16.78                | $y = 59.618x - 200.87$ | 0.848      | 2.826      | 0.998 |
|                       | Gallic acid           | -               | 5.25                 | $y = 20.642x - 50.802$ | 0.895      | 2.983      | 0.989 |
|                       | Vanillic acid         | -               | 29.83                | $y = 4.6498x - 18.158$ | 0.421      | 1.403      | 0.992 |
| Flavonols             | Isorhamnetin          | -               | 31.84                | $y = 5.2125x - 13.553$ | 1.128      | 3.760      | 0.997 |
|                       | Quercetin             | -               | 37.06                | $y = 1.2944x - 4.1921$ | 1.221      | 4.070      | 0.998 |
| Estilbenes            | Polidatin             | -               | 33.12                | $y = 39.529x - 89.901$ | 0.715      | 2.383      | 0.997 |
|                       | Resveratrol           | -               | 26.35                | $y = 15.725x - 55.016$ | 0.388      | 1.295      | 0.991 |
| Flavanols             | Catechin              | +               | 133                  | $y = 24.117x - 44.19$  | 0.355      | 1.184      | 0.999 |
|                       | Epicatechin           | +               | 14.2                 | $y = 18.621x - 37.673$ | 0.877      | 2.925      | 0.997 |

**Table S3.** Selection of 56 polyphenols present in grapes with the most relevant parameters for their identification and analysis by mass spectrometry. Q1, (m/z) of the polyphenol to be analyzed. Q3, indicates the majority and stable fragment. CE is the collision energy. DP (declustering potential), CXP (collision cell output potential), EP (entrance potential). BR (bibliographic reference from which the information is derived).

| N° | Compound                 | Q1 (Da) | Q3(Da) | DP (V) | EP (V) | CE (V) | CXP (V) | BR   |
|----|--------------------------|---------|--------|--------|--------|--------|---------|------|
| 1  | 4-Metilumbeliferone      | 174.9   | 133.0  | -135.0 | -10.0  | -28.0  | -9.0    | [53] |
|    |                          |         | 119.1  | -135.0 | -10.0  | -36.0  | -7.0    |      |
| 2  | Aminobenzoic acid        | 137.1   | 77.0   | 56.0   | 10.0   | 29.0   | 10.0    |      |
|    |                          |         | 94.0   | 56.0   | 10.0   | 19.0   | 8.0     |      |
| 3  | Benzoic acid             | 122.9   | 79.0   | 36.0   | 10.0   | 17.0   | 12.0    |      |
|    |                          |         | 51.0   | 36.0   | 10.0   | 51.0   | 24.0    | [57] |
| 4  | Caffeic acid             | 178.9   | 135.0  | -50.0  | -10.0  | -22.0  | -9.0    |      |
|    |                          |         | 107.0  | -115.0 | -10.0  | -30.0  | -7.0    | [53] |
| 5  | Caftaric acid            | 312.2   | 149.0  | -100.0 |        | -126.0 | -10.0   |      |
| 6  | Chlorogenic acid         | 355.1   | 163.0  | 46.0   | 10.0   | 21.0   | 10.0    | [53] |
|    |                          |         | 89.0   | 46.0   | 10.0   | 75.0   | 14.0    |      |
| 7  | Cumaric acid             | 162.9   | 119.0  | -90.0  | -10.0  | -20.0  | -7.0    |      |
|    |                          |         | 93.0   | -30.0  | -10.0  | -30.0  | -5.0    | [60] |
| 8  | Dihydroxybenzoic acid    | 152.9   | 109.0  | -75.0  | -10.0  | -20.0  | -7.0    |      |
|    |                          |         | 109.0  | -75.0  | -10.0  | -20.0  | -13.0   | [57] |
| 9  | Ellagic acid             | 303.2   | 285.2  | 100.0  | 10.0   | 27.0   | 5.0     |      |
|    |                          |         | 210.9  | 100.0  | 10.0   | 27.0   | 5.0     |      |
|    |                          |         | 130.9  | 100.0  | 10.0   | 27.0   | 5.0     | [53] |
| 10 | Fertaric acid            | 325.1   | 193.0  |        |        |        |         |      |
| 11 | Ferulic acid             | 195.0   | 176.9  | 21.0   | 10.0   | 11.0   | 10.0    | [64] |
|    |                          |         | 89.0   | 21.0   | 10.0   | 41.0   | 10.0    |      |
| 12 | Gallic acid              | 170.1   | 124.9  | -110.0 | -10.0  | -20.0  | -7.0    |      |
|    |                          |         | 79.0   | -110.0 | -10.0  | -30.0  | -11.0   | [53] |
| 13 | Lipoic acid              | 205.1   | 171.0  | -30.0  | -4.0   | -14.0  | -1.0    |      |
|    |                          |         | 205.1  | -25.0  | -4.0   | -5.0   | -15.0   | [53] |
| 14 | Protocatechuic acid      | 152.9   | 90.9   | -75.0  | -10.0  | -32.0  | -13.0   |      |
| 16 | Salicylic acid           | 136.9   | 93.1   | -15.0  | -10.0  | -22.0  | -5.0    | [57] |
|    |                          |         | 64.9   | -15.0  | -10.0  | -36.0  | -11.0   |      |
| 17 | Sinapic acid             | 223.0   | 163.9  | -120.0 | -10.0  | -20.0  | -9.0    | [53] |
|    |                          |         | 192.9  | -120.0 | -10.0  | -28.0  | -11.0   |      |
| 18 | Syringic acid            | 199.0   | 140.0  | 16.0   | 10.0   | 21.0   | 10.0    |      |
|    |                          |         | 155.1  | 16.0   | 10.0   | 13.0   | 10.0    | [62] |
| 19 | Vanillic acid            | 166.9   | 137.0  | -140.0 | -10.0  | -12.0  | -9.0    |      |
|    |                          |         | 109.1  | -140.0 | -10.0  | -16.0  | -7.0    | [61] |
| 20 | Apigenine                | 271.0   | 253.1  | 100.0  | 10.0   | 14.0   | 10.0    |      |
|    |                          |         | 239.3  | 100.0  | 10.0   | 20.0   | 10.0    |      |
| 21 | Astilbin                 | 451.1   | 305.1  | 147.1  |        | 85.0   |         | [53] |
| 22 | Catechin                 | 291.0   | 139.0  | 16.0   | 10.0   | 21.0   | 10.0    |      |
|    |                          |         | 123.0  | 16.0   | 10.0   | 19.0   | 8.0     | [57] |
| 23 | Chrysine                 | 223.0   | 142.9  | -170.0 | -10.0  | -36.0  | -9.0    |      |
|    |                          |         | 209.1  | -170.0 | -10.0  | -30.0  | -11.0   |      |
| 24 | Coniferaldehyde          | 177.0   | 134.0  | -30.0  | -10.0  | -28.0  | -9.0    | [62] |
|    |                          |         | 160.8  | -30.0  | -10.0  | -28.0  | -11.0   |      |
| 25 | Cumarin                  | 165.1   | 147.0  | 150.0  | 10.0   | 65.0   |         | [61] |
| 26 | Daidzein                 | 255.2   | 199.0  |        |        | 35.0   |         |      |
| 27 | Epicatechin              | 291.0   | 138.9  | 36.0   | 10.0   | 21.0   | 8.0     | [53] |
|    |                          |         | 123.0  | 36.0   | 10.0   | 21.0   | 8.0     |      |
| 28 | Epigallocatechin gallate | 457.0   | 169.0  | -165.0 | -10.0  | -20.0  | -11.0   |      |
|    |                          |         | 125.0  | -165.0 | -10.0  | -52.0  | -9.0    |      |

|    |                           |       |       |        |       |       |       |      |
|----|---------------------------|-------|-------|--------|-------|-------|-------|------|
| 29 | Escopoletin               | 192.2 | 193.2 | 132.9  | -10.0 | -26.0 | -11.0 | [53] |
| 30 | Esculetin                 | 175.9 | 133.1 | -100.0 | 5.0   | -25.0 | -10.0 | [63] |
|    |                           |       | 105.0 | -100.0 | 5.0   | -21.0 | -10.0 |      |
| 31 | Etil gallate              | 197.0 | 123.9 | -135.0 | -10.0 | -20.0 |       | [65] |
| 32 | Fisetin                   | 285.1 | 134.9 | -50.0  | -7.0  | -28.0 | -15.0 | [58] |
| 33 | Floretin                  | 274.3 | 273.0 | 168.0  | 106.0 |       |       | [67] |
| 34 | Floridzin                 | 579.0 | 436.4 |        |       |       |       |      |
| 35 | Galangin                  | 271.0 | 153.0 | 176.0  | 10.0  | 43.0  | 10.0  | [53] |
|    |                           |       | 115.1 | 176.0  | 10.0  | 59.0  | 8.0   |      |
| 36 | Hesperidin                | 611.2 | 303.0 | 51.0   | 10.0  | 31.0  | 16.0  |      |
|    |                           |       | 153.1 | 51.0   | 10.0  | 67.0  | 10.0  |      |
| 37 | Isorhamnetin              | 315.0 | 300.0 | -225.0 | -10.0 | -28.0 | -15.0 |      |
|    |                           |       | 150.9 | -225.0 | -10.0 | -38.0 | -9.0  |      |
| 38 | Kaempferol                | 285.0 | 229.0 | -80.0  | -10.0 | -20.0 |       | [55] |
|    |                           |       | 255.0 | -80.0  | -10.0 | -25.0 |       |      |
|    |                           | 286.9 | 153.0 | 111.0  | 10.0  | 43.0  | 10.0  | [53] |
|    |                           |       | 268.9 | 100.0  | 10.0  | 17.0  | 9.0   |      |
| 39 | Luteolin                  | 286.9 | 153.0 | 100.0  | 10.0  | 17.0  | 9.0   | [56] |
|    |                           |       | 68.9  | 111.0  | 10.0  | 89.0  | 10.0  |      |
| 40 | Metil gallate             | 183.0 | 124.0 | -98.0  | -10.0 | -30.0 | -9.0  | [56] |
| 41 | Myricetin                 | 317.0 | 271.0 | -75.0  | -10.0 | -20.0 |       | [55] |
|    |                           |       | 271.0 | -75.0  | -10.0 | -20.0 |       |      |
| 42 | Naringenin                | 271.0 | 151.0 | -130.0 | -10.0 | -24.0 | -25.0 | [53] |
|    |                           |       | 119.0 | -130.0 | -10.0 | -34.0 | -11.0 |      |
| 43 | Naringin                  | 579.0 | 271.0 | -255.0 | -10.0 | -42.0 | -13.0 |      |
|    |                           |       | 151.0 | -255.0 | -10.0 | -48.0 | -9.0  |      |
| 44 | Pinobanksin               | 271.0 | 150.9 | -140.0 | -10.0 | -24.0 | -9.0  |      |
|    |                           |       | 119.5 | -140.0 | -10.0 | -32.0 | -7.0  |      |
| 45 | Pinocembrin               | 256.3 | 153.0 | 96.0   | 10.0  | 33.0  | 10.0  | [65] |
|    |                           |       | 76.9  | 96.0   | 10.0  | 73.0  | 10.0  |      |
| 46 | Propil gallate            | 211.0 | 123.9 | -140.0 | -10.0 | -21.0 |       | [65] |
| 47 | Pterostilbene             | 256.3 |       | -50.0  |       | -35.0 |       | [66] |
|    |                           |       |       | 43.0   |       | 35.0  |       |      |
| 48 | Pterostilbene dimer       | 511.2 |       |        |       | 35.0  |       | [61] |
| 49 | Pueraine                  | 417.1 | 296.9 | 20.0   | 10.0  | 35.0  | 10.0  | [61] |
| 50 | Quercetine                | 301.0 | 150.9 | -50.0  | -10.0 | -28.0 | -9.0  | [53] |
|    |                           |       | 121.0 | -50.0  | -10.0 | -34.0 | -7.0  |      |
|    |                           | 301.0 | 151.0 | -85.0  | -10.0 | -20.0 |       | [55] |
|    |                           |       | 271.0 | -85.0  | -10.0 | -25.0 |       |      |
|    |                           | 301.1 | 150.9 | -50.0  | -7.0  | -28.0 | -15.0 | [58] |
| 51 | Rutin                     | 609.0 | 299.9 | -230.0 | -10.0 | -48.0 | -15.0 | [53] |
|    |                           |       | 270.9 | -230.0 | -10.0 | -70.0 | -9.0  |      |
| 52 | Sinapaldehyde             | 206.9 | 177.0 | -20.0  | -10.0 | -26.0 | -11.0 |      |
|    |                           |       | 148.9 | -20.0  | -10.0 | -34.0 | -9.0  |      |
| 53 | Siringaldehyde            | 183.0 | 123.1 | 41.0   | 10.0  | 17.0  | 8.0   | [57] |
|    |                           |       | 77.0  | 41.0   | 10.0  | 31.0  | 10.0  |      |
| 54 | Taxifolin                 | 304.3 | 259.1 | -70.0  | -10.0 | -10.0 | -3.0  | [59] |
|    |                           | 303.0 | 285.0 | -70.0  | -10.0 | -10.0 | -3.0  |      |
| 55 | <i>trans</i> -Resveratrol | 228.2 | 91.0  | 75.0   | 10.0  | 32.0  | 7.0   |      |
|    |                           |       | 135.0 | 75.0   | 10.0  | 21.0  | 10.0  |      |
|    |                           |       | 107.0 | 75.0   | 10.0  | 32.0  | 8.0   |      |
| 56 | Viniferin                 | 455.1 | 361.2 |        |       |       |       |      |
|    |                           | 453.0 | 361.2 |        |       |       |       |      |
|    |                           |       | 410.9 | -45.0  | -9.0  | -36.5 | -9.0  | [59] |

**Table S4.** Concentration of the 15 polyphenols identified in the concentrated grape juice extracts (mg/L  $\pm$  standard deviation) including the relative variation (%) between the determined concentration and the theoretical expected. nd (non-detected).

|                       |                       |                      | NCJ <sub>19</sub>   | NCJ <sub>30</sub> | NCJ <sub>65</sub> | DCJ <sub>19</sub>   | DCJ <sub>30</sub>    | DCJ <sub>65</sub>   |
|-----------------------|-----------------------|----------------------|---------------------|-------------------|-------------------|---------------------|----------------------|---------------------|
| Hydroxycinnamic acids | Caffeic acid          | Concentration (mg/L) | 4.104 $\pm$ 0.003   | 4.131 $\pm$ 0.001 | 4.57 $\pm$ 0.011  | 4.0127 $\pm$ 0.0006 | 4.0294 $\pm$ 0.0005  | 4.076 $\pm$ 0.002   |
|                       |                       | % Variation          |                     | -36.26            | -67.45            |                     | -36.4                | -70.31              |
|                       | Chlorogenic acid      | Concentration (mg/L) | 3.2203 $\pm$ 0.0004 | 3.236 $\pm$ 0.001 | 3.361 $\pm$ 0.007 | 3.201 $\pm$ 0.001   | 3.2049 $\pm$ 0.0002  | 3.232 $\pm$ 0.006   |
|                       |                       | % Variation          |                     | -36.36            | -69.49            |                     | -36.59               | -70.49              |
|                       | Cumaric acid          | Concentration (mg/L) | 3.14 $\pm$ 0.02     | 3.24 $\pm$ 0.11   | 5.23 $\pm$ 0.14   | 2.81 $\pm$ 0.02     | 2.810 $\pm$ 0.008    | 2.91 $\pm$ 0.02     |
|                       |                       | % Variation          |                     | -34.65            | -51.32            |                     | -36.64               | -69.76              |
| Hydroxybenzoic acids  | Dihydroxybenzoic acid | Concentration (mg/L) | 3.296 $\pm$ 0.012   | 3.497 $\pm$ 0.036 | 4.496 $\pm$ 0.088 | 3.08 $\pm$ 0.01     | 3.142 $\pm$ 0.006    | 3.418 $\pm$ 0.005   |
|                       |                       | % Variation          |                     | -36.67            | -62.4             |                     | -35.28               | -67.51              |
|                       | Gallic acid           | Concentration (mg/L) | 3.41 $\pm$ 0.01     | 3.796 $\pm$ 0.071 | 5.5 $\pm$ 0.2     | 3.30 $\pm$ 0.02     | 3.36 $\pm$ 0.02      | 4.05 $\pm$ 0.105    |
|                       |                       | % Variation          |                     | -29.49            | -52.56            |                     | -35.56               | -64.19              |
|                       | Protocatechuic acid   | Concentration (mg/L) | 3.55 $\pm$ 0.01     | 3.75 $\pm$ 0.04   | 4.7 $\pm$ 0.1     | 3.34 $\pm$ 0.01     | 3.407 $\pm$ 0.004    | 3.59 $\pm$ 0.06     |
|                       |                       | % Variation          |                     | -33.18            | -61.4             |                     | -35.36               | -68.6               |
|                       | Salicylic acid        | Concentration (mg/L) | 2.523 $\pm$ 0.001   | 2.526 $\pm$ 0.002 | 2.621 $\pm$ 0.006 | 2.511 $\pm$ 0.001   | 2.511 $\pm$ 0.001    | 2.5271 $\pm$ 0.0004 |
|                       |                       | % Variation          |                     | -36.6             | -69.64            |                     | -36.67               | -70.58              |
|                       | Vanillic acid         | Concentration (mg/L) | 3.663 $\pm$ 0.001   | 3.665 $\pm$ 0.001 | 3.717 $\pm$ 0.001 | 3.6583 $\pm$ 0.0005 | 3.6582 $\pm$ 0.0006  | 3.6643 $\pm$ 0.0008 |
|                       |                       | % Variation          |                     | -36.59            | -70.34            |                     | -36.67               | -70.72              |
| Estilbenes            | Polidatin             | Concentration (mg/L) | 2.531 $\pm$ 0.002   | 2.55 $\pm$ 0.01   | 2.80 $\pm$ 0.03   | 2.5016 $\pm$ 0.0001 | 2.5002 $\pm$ 0.00001 | 2.509 $\pm$ 0.0001  |
|                       |                       | % Variation          |                     | -36.09            | -67.66            |                     | -36.66               | -70.69              |
|                       | Resveratrol           | Concentration (mg/L) | 4.893 $\pm$ 0.002   | 5.07 $\pm$ 0.03   | 5.083 $\pm$ 0.006 | 3.2404 $\pm$ 0.0002 | 3.2404 $\pm$ 0.0003  | 3.2415 $\pm$ 0.0003 |
|                       |                       | % Variation          |                     | -34.34            | -69.63            |                     | -36.67               | -70.76              |
| Flavonoids            | Catechin              | Concentration (mg/L) | 5.26 $\pm$ 0.09     | 7.4 $\pm$ 0.4     | 11.1 $\pm$ 0.5    | 3.081 $\pm$ 0.007   | 3.34 $\pm$ 0.07      | 4.5 $\pm$ 0.5       |
|                       |                       | % Variation          |                     | -11.47            | -38.37            |                     | -30.12               | -57.74              |
|                       | Epicatechin           | Concentration (mg/L) | 1.84 $\pm$ 0.01     | 2.7 $\pm$ 0.1     | 3.20 $\pm$ 0.03   | 3.089 $\pm$ 0.002   | 3.149 $\pm$ 0.008    | 3.399 $\pm$ 0.11    |
|                       |                       | % Variation          |                     | -7.86             | -49.26            |                     | -35.42               | -67.82              |
|                       | Isorhamnetin          | Concentration (mg/L) | nd                  | 2.528 $\pm$ 0.002 | 2.613 $\pm$ 0.006 | nd                  | 2.5125 $\pm$ 0.0004  | 2.5155 $\pm$ 0.0007 |
|                       |                       | % Variation          |                     | nd                | nd                |                     | nd                   | nd                  |
|                       | Quercetin             | Concentration (mg/L) | 8.7 $\pm$ 0.3       | 15.30 $\pm$ 1.03  | 54.3 $\pm$ 1.3    | 3.48 $\pm$ 0.02     | 4.797 $\pm$ 0.02     | 6.6 $\pm$ 0.25      |
|                       |                       | % Variation          |                     | +11.81            | +83.12            |                     | -12.66               | -44.9               |
| Phenylpropanoids      | Esculetin             | Concentration (mg/L) | 2.054 $\pm$ 0.001   | 2.057 $\pm$ 0.001 | 2.078 $\pm$ 0.001 | 2.052 $\pm$ 0.001   | 2.053 $\pm$ 0.001    | 2.054 $\pm$ 0.001   |
|                       |                       | % Variation          |                     | -36.6             | -69.51            |                     | -37.7                | -70.02              |
